# Supplementary material for: The Dually Localized EF-Hand Domain-Containing Protein TgEFP1 Regulates the Lytic Cycle of Toxoplasma gondii
Source: MDPI journal article supplement (doi:10.3390/cells11101709), 2022-05-21
Supplement: s1 [file s1]

## Supplemental materials

Table S1. Primers used in this study.

| Purpose                                                | Name                  | Sequence                                                             |
|--------------------------------------------------------|-----------------------|----------------------------------------------------------------------|
| Generate vector to tag endogenous TgEFP1               | EFP1HA forward        | ccccgcgcttctgccaccaagcttcgccaggctgt                                  |
|                                                        | EFP1HA reverse        | accgttctcgccagtttcacCAcCctgcaaGtgcatagaaggaa                         |
| Generate pSag1-Cas9-U6-sg1EFP1 by using Q5 mutagenesis | EFP1SG1 forward       | ccaacggagagtttagagctagaaatagc                                        |
|                                                        | EFP1SG1 reverse       | agtcgaactcaactgacatccccatttac                                        |
| Amplifying donor template for knockout clone 1         | DonorKO1 forward      | ggacgaagacgacgagggccttcacgcgaggaattcatggaacaa<br>aagttgatttctgaagaag |
|                                                        | DonorKO1 reverse      | tgcttcttctcctctgtgttctgcttttgacgcctagcggaagatccgat<br>cttgc          |
| Generate pSag1-Cas9-U6-sg2EFP1 by using Q5 mutagenesis | EFP1SG2 forward       | ttccggctaggttttagagctagaaatagc                                       |
|                                                        | EFP1SG2 reverse       | gaaagaaaacaactgacatccccatttac                                        |
| Amplifying donor template for knockout clone 1         | DonorKO2 forward      | aggccgagtgacgcacccgaaatcggaacagcgaactgaacaa<br>aagttgatttctgaagaag   |
|                                                        | DonorKO2 reverse      | cgatattctgcgagagtcaagagtccatcttggttgagtgcggaagat<br>ccgatcttg        |
| Amplifying TgEFP1 gDNA to make complementing construct | TgEFP1comp WT forward | ggaggacgggaattcaaggagatggggacggcg                                    |
|                                                        | TgEFP1comp WT reverse | gttcctaggggaattcaatagctgatgatacatactcgcgatatt                        |
| Deleting signal peptide from complementing construct   | $\Delta$ SP forward   | ccaccatgttcgcgcgcctggcgctcg                                          |
|                                                        | $\Delta$ SP reverse   | gcgcgaacatggtggcaggaagcgc                                            |
| Generation of D97A complementation construct using Q5  | D97A forward          | catggagtacgcatccaacggag                                              |
|                                                        | D97A reverse          | aattcctcgcgatgaag                                                    |
| Generation of D129A complementation construct using Q5 | D129A forward         | ccggctagtggcatccaaccaag                                              |
|                                                        | D129A reverse         | aagaaagaaaacagttcgc                                                  |

|                                                |              |                                                                            |
|------------------------------------------------|--------------|----------------------------------------------------------------------------|
| Targeting complementing template to Ku80 locus | KU80 forward | gtccccgggtcgctcagcacacacacacatgacgtacatcgagggga<br>acaaaagctgggtac         |
|                                                | KU80 reverse | ggatagctccattgtttctgatgggaactattccgacattacattcatcctg<br>caagtgcataagaaggaa |

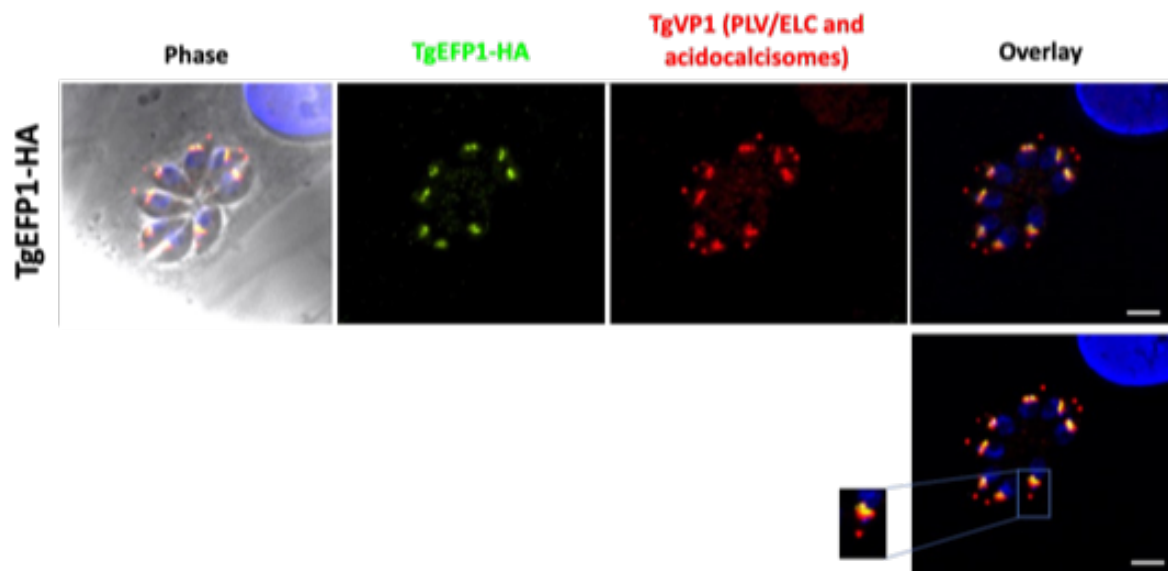

**Figure S1: TgEFP1 co-localizes with TgVP1 only at the PLV/ELC and not at the acidocalcisome.** Intracellular parasites stained for TgEFP1-HA (green) and TgVP1 (red). Overlay shows co-localization (yellow) of TgEFP1 and TgVP1 at the PLV/ELC. TgVP1 localization is also observed at the acidocalcisomes which is apically localized (red). Scale bars represent 2µM.
